# Supplementary material
Source: publisher site journal article supplement (https://www.dovepress.com/article/296540)
Supplement: Supplementary file 1 [file get_supplementary_file.php]

**Supplementary materials**

**
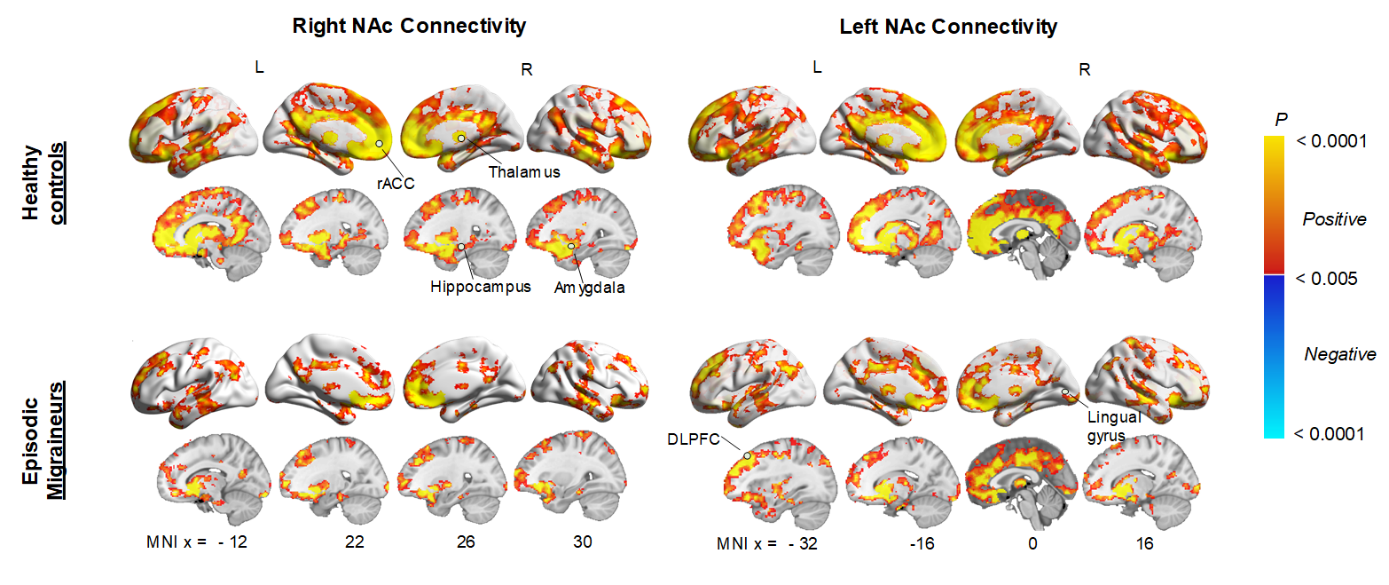
**

**Supplementary figure 1.** The whole-brain wise resting-state functional connectivity with the right and left nucleus accumbens by one-sample t-test within each group.The statistical map was corrected with a threshold of *p* < 0.05 (height threshold of uncorrected *p* < 0.005, combined with a cluster extent threshold of *p* < 0.05). Brain slices are presented based on MNI coordinates.

**Abbreviations:** DLPFC, dorsolateral prefrontal cortex; NAc, nucleus accumbens; rACC, rostral anterior cingulate cortex.
